# Supplementary material for: CD147 promotes Src-dependent activation of Rac1 signaling through STAT3/DOCK8 during the motility of hepatocellular carcinoma cells
Source: PubMed Central journal article supplement (PMC4381592; doi:10.18632/oncotarget.2801), 2014-11-16
Supplement: oncotarget-06-243-s001.pdf [file oncotarget-06-243-s001.pdf]

## CD147 promotes Src-dependent activation of Rac1 signaling through STAT3/DOCK8 during the motility of hepatocellular carcinoma cells

### Supplementary Material

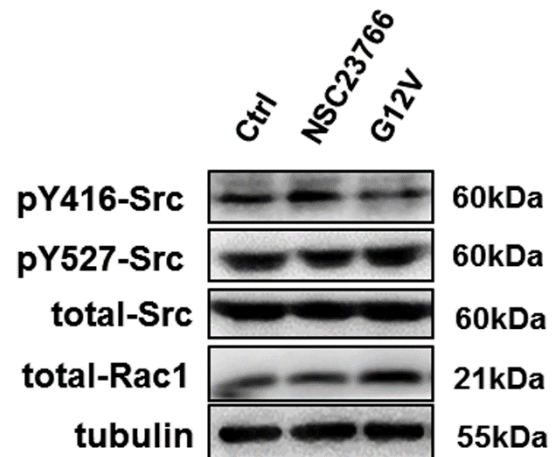

**Supplementary Fig. 1:** Phosphorylation of Src was assessed using western blotting in 7721 cells treated with Src inhibitor (NSC23766) or transfected with G12V mutant.
